# Supplementary material for: Tumor Intrinsic Efficacy by SHP2 and RTK Inhibitors in KRAS-Mutant Cancers
Source: Oxford University Press journal article supplement (doi:10.1158/1535-7163.mct-19-0170), 2019-08-22
Supplement: 15357163mct190170-sup-217436_2_supp_5691166_pvrtk4.xlsx [file 15357163mct190170-sup-217436_2_supp_5691166_pvrtk4.xlsx]

## Sheet: PTPN11 shRNA data
Cell Line Name	Lineage	DRIVE_Ataris_Quantile.PTPN11	Mut.KRAS	Mut.BRAF		KRAS G12C
nb4	haematopoietic_and_lymphoid_tissue		A18D, AMP	WT		Gain of Function = BRAF V600E
ovk18	ovary		A59G	WT		Gain of Function = KRAS G12[x], G13[x], Q61[x}
snu175	large_intestine		A59T	WT
nudul1	haematopoietic_and_lymphoid_tissue		D119N	WT
jhuem3	endometrium		D33E	WT
kyse410	oesophagus	-0.483	G12C	WT
hcc44	lung	-0.355	G12C	WT
miapaca2	pancreas	-0.248	G12C	WT
ncih1373	lung	0.125	G12C	WT
ncih1792	lung	0.145	G12C	WT
ncih358	lung	0.171	G12C	WT
sw1463	large_intestine	0.339	G12C	WT
ncih2030	lung	0.373	G12C	WT
ncih23	lung	0.401	G12C	WT
sw1573	lung	0.456	G12C	WT
ncih2122	lung	0.706	G12C	WT
calu1	lung		G12C	WT
hcc1171	lung		G12C	WT
ialm	lung		G12C	WT
khm1b	haematopoietic_and_lymphoid_tissue		G12C	WT
lim2099	large_intestine		G12C	WT
lu65	lung		G12C	WT
lu99	lung		G12C	WT
ncih1385	lung		G12C	WT
ov56	ovary		G12C	WT
sw837	large_intestine		G12C	WT
yd8	upper_aerodigestive_tract		G138V	WT
sw620	large_intestine	-0.608	Gain of Function	WT
shp77	lung	-0.542	Gain of Function	WT
ncih2291	lung	-0.495	Gain of Function	WT
rpmi8226	haematopoietic_and_lymphoid_tissue	-0.456	Gain of Function	WT
kms28bm	haematopoietic_and_lymphoid_tissue	-0.353	Gain of Function	WT
ags	stomach	-0.3	Gain of Function	WT
panc0504	pancreas	-0.299	Gain of Function	WT
hupt4	pancreas	-0.263	Gain of Function	WT
corl23	lung	-0.238	Gain of Function	WT
snu61	large_intestine	-0.183	Gain of Function	WT
panc1005	pancreas	-0.177	Gain of Function	WT
suit2	pancreas	-0.135	Gain of Function	WT
ncih2009	lung	-0.108	Gain of Function	WT
sw403	large_intestine	-0.083	Gain of Function	WT
ls180	large_intestine	-0.076	Gain of Function	D211G
sw948	large_intestine	-0.074	Gain of Function	WT
ncih747	large_intestine	-0.06	Gain of Function	WT
cl11	large_intestine	-0.047	Gain of Function	WT
hupt3	pancreas	-0.022	Gain of Function	WT
a549	lung	-0.005	Gain of Function	WT
calu6	lung	-0.002	Gain of Function	WT
ncih441	lung	0.013	Gain of Function	WT
panc0203	pancreas	0.013	Gain of Function	WT
umuc3	urinary_tract	0.035	Gain of Function	WT
cfpac1	pancreas	0.041	Gain of Function	WT
l33	pancreas	0.047	Gain of Function	WT
snu1	stomach	0.107	Gain of Function	A400V
dang	pancreas	0.125	Gain of Function	WT
skco1	large_intestine	0.126	Gain of Function	WT
patu8902	pancreas	0.146	Gain of Function	WT
snu407	large_intestine	0.214	Gain of Function	R726C
panc1	pancreas	0.215	Gain of Function	WT
panc0403	pancreas	0.229	Gain of Function	WT
sw1990	pancreas	0.236	Gain of Function	WT
ncih1573	lung	0.257	Gain of Function	WT
kp4	pancreas	0.266	Gain of Function	WT
dld1	large_intestine	0.278	Gain of Function	WT
ls513	large_intestine	0.301	Gain of Function	WT
snuc2a	large_intestine	0.307	Gain of Function	WT
hmc18	breast	0.329	Gain of Function	WT
tccpan2	pancreas	0.355	Gain of Function	WT
kp1n	pancreas	0.369	Gain of Function	WT
ncih460	lung	0.375	Gain of Function	WT
ncih1944	lung	0.405	Gain of Function	WT
lovo	large_intestine	0.432	Gain of Function	WT
hct15	large_intestine	0.44	Gain of Function	WT
hct116	large_intestine	0.443	Gain of Function	WT
ncih1355	lung	0.47	Gain of Function	WT
heya8	ovary	0.503	Gain of Function	G464E
sngm	endometrium	0.51	Gain of Function	WT
pk1	pancreas	0.548	Gain of Function	WT
sw480	large_intestine	0.553	Gain of Function	WT
patu8988t	pancreas	0.562	Gain of Function	WT
kpnsi9s	autonomic_ganglia	0.565	Gain of Function	WT
colo678	large_intestine	0.566	Gain of Function	WT
kp3	pancreas	0.577	Gain of Function	WT
su8686	pancreas	0.585	Gain of Function	WT
hec1a	endometrium	0.588	Gain of Function	R682Q
hec50b	endometrium	0.589	Gain of Function	WT
mdamb231	breast	0.612	Gain of Function	G464V
snu81	large_intestine	0.839	Gain of Function	WT
a427	lung		Gain of Function	WT
amo1	haematopoietic_and_lymphoid_tissue		Gain of Function	WT
aspc1	pancreas		Gain of Function	WT
cal62	thyroid		Gain of Function	WT
capan1	pancreas		Gain of Function	WT
capan2	pancreas		Gain of Function	WT
ccrfcem	haematopoietic_and_lymphoid_tissue		Gain of Function	WT
cemc1	haematopoietic_and_lymphoid_tissue		Gain of Function	WT
cl40	large_intestine		Gain of Function	WT
colo668	lung		Gain of Function	WT
dv90	lung		Gain of Function	WT
gp2d	large_intestine		Gain of Function	T529A
gsu	stomach		Gain of Function	WT
hcc1588	large_intestine		Gain of Function	E204L
hcc56	large_intestine		Gain of Function	WT
hec1b	endometrium		Gain of Function	R682Q
hpac	pancreas		Gain of Function	WT
hpafii	pancreas		Gain of Function	WT
hs766t	pancreas		Gain of Function	WT
hucct1	biliary_tract		Gain of Function	WT
karpas620	haematopoietic_and_lymphoid_tissue		Gain of Function	WT
kms20	haematopoietic_and_lymphoid_tissue		Gain of Function	WT
kopn8	haematopoietic_and_lymphoid_tissue		Gain of Function	WT
kp2	pancreas		Gain of Function	WT
lclc97tm1	lung		Gain of Function	WT
lim1899	large_intestine		Gain of Function	WT
lim2550	large_intestine		Gain of Function	WT
ls1034	large_intestine		Gain of Function	WT
ls123	large_intestine		Gain of Function	WT
mcas	ovary		Gain of Function	WT
mm1s	haematopoietic_and_lymphoid_tissue		Gain of Function	WT
morcpr	lung		Gain of Function	WT
ncih1155	lung		Gain of Function	WT
ncih1339	lung		Gain of Function	WT
ncih1734	lung		Gain of Function	WT
ncih2444	lung		Gain of Function	WT
ncih647	lung		Gain of Function	WT
ncih650	lung		Gain of Function	WT
ncih727	lung		Gain of Function	WT
nomo1	haematopoietic_and_lymphoid_tissue		Gain of Function	WT
nudhl1	haematopoietic_and_lymphoid_tissue		Gain of Function	WT
ov7	ovary		Gain of Function	WT
panc0213	pancreas		Gain of Function	WT
panc0327	pancreas		Gain of Function	WT
panc0813	pancreas		Gain of Function	WT
patu8988s	pancreas		Gain of Function	WT
pk45h	pancreas		Gain of Function	WT
pk59	pancreas		Gain of Function	WT
pl21	haematopoietic_and_lymphoid_tissue		Gain of Function	WT
psn1	pancreas		Gain of Function	WT
qgp1	pancreas		Gain of Function	WT
rcm1	large_intestine		Gain of Function	WT
rerflcad1	lung		Gain of Function	R435S
rerflcad2	lung		Gain of Function	WT
rkn	soft_tissue		Gain of Function	WT
sh10tc	stomach		Gain of Function	WT
sklu1	lung		Gain of Function	WT
snu1197	large_intestine		Gain of Function	WT
snu213	pancreas		Gain of Function	WT
snu410	pancreas		Gain of Function	D22N
snu601	stomach		Gain of Function	WT
snu668	stomach		Gain of Function	WT
snu8	ovary		Gain of Function	WT
sum229pe	breast		Gain of Function	WT
sw1116	large_intestine		Gain of Function	WT
sw900	lung		Gain of Function	WT
t3m4	pancreas		Gain of Function	WT
t84	large_intestine		Gain of Function	WT
tgbc11tkb	stomach		Gain of Function	WT
toledo	haematopoietic_and_lymphoid_tissue		Gain of Function	WT
tov21g	ovary		Gain of Function	WT
yapc	pancreas		Gain of Function	WT
skm1	haematopoietic_and_lymphoid_tissue		K117N	WT
molp8	haematopoietic_and_lymphoid_tissue		K180-	WT
ncih2347	lung		L19F	WT
mhhcall4	haematopoietic_and_lymphoid_tissue		L23R	WT
ovcar8	ovary	-0.176	P121H	WT
cw2	large_intestine	-0.29	P140H	WT
nugc2	stomach		T58I, AMP	WT
ten	endometrium	-0.072	T74P	WT
rchacv	haematopoietic_and_lymphoid_tissue	0.323	V14I	WT
kasumi2	haematopoietic_and_lymphoid_tissue	0.169	V14L	WT
hec6	endometrium	0.01	VR160AR	WT
mkn45	stomach	-2.088	WT	WT
jmsu1	urinary_tract	-1.944	WT	WT
molm13	haematopoietic_and_lymphoid_tissue	-1.692	WT	WT
molm16	haematopoietic_and_lymphoid_tissue	-1.668	WT	WT
kasumi1	haematopoietic_and_lymphoid_tissue	-1.613	WT	WT
monomac6	haematopoietic_and_lymphoid_tissue	-1.608	WT	WT
ncih508	large_intestine	-1.499	WT	G596R
monomac1	haematopoietic_and_lymphoid_tissue	-1.429	WT	WT
rerflcms	lung	-1.195	WT	WT
cmk	haematopoietic_and_lymphoid_tissue	-1.129	WT	WT
hcc1954	breast	-1.091	WT	WT
mkn7	stomach	-1.078	WT	WT
hel9217	haematopoietic_and_lymphoid_tissue	-1.074	WT	WT
ublc1	urinary_tract	-1.067	WT	WT
ncih1568	lung	-1.024	WT	WT
ncih2110	lung	-0.969	WT	WT
snu886	liver	-0.94	WT	WT
nugc3	stomach	-0.937	WT	WT
bc3c	urinary_tract	-0.936	WT	WT
hcc827	lung	-0.92	WT	WT
cck81	large_intestine	-0.918	WT	S273N
ncih716	large_intestine	-0.891	WT	WT
hs578t	breast	-0.885	WT	WT
hep3b217	liver	-0.877	WT	WT
saos2	bone	-0.868	WT	WT
huh6	liver	-0.853	WT	WT
yd38	upper_aerodigestive_tract	-0.851	WT	WT
ncin87	stomach	-0.847	WT	WT
mfe296	endometrium	-0.845	WT	WT
ebc1	lung	-0.843	WT	WT
cal851	breast	-0.823	WT	WT
ncih2286	lung	-0.82	WT	WT
ncih1581	lung	-0.813	WT	WT
mpp89	pleura	-0.759	WT	WT
sem	haematopoietic_and_lymphoid_tissue	-0.757	WT	WT
igrov1	ovary	-0.755	WT	WT
sknfi	autonomic_ganglia	-0.753	WT	WT
im95	stomach	-0.749	WT	WT
pecapj41cloned2	upper_aerodigestive_tract	-0.745	WT	WT
ht1376	urinary_tract	-0.744	WT	WT
ht115	large_intestine	-0.743	WT	R354Q
bt16	central_nervous_system	-0.717	WT	WT
sknbe2	autonomic_ganglia	-0.714	WT	WT
sw579	thyroid	-0.687	WT	WT
cal51	breast	-0.682	WT	WT
caov3	ovary	-0.681	WT	WT
hel	haematopoietic_and_lymphoid_tissue	-0.673	WT	WT
gi1	central_nervous_system	-0.672	WT	WT
u2os	bone	-0.658	WT	WT
snu1079	biliary_tract	-0.643	WT	WT
jhh6	liver	-0.634	WT	WT
corl105	lung	-0.633	WT	WT
sw780	urinary_tract	-0.629	WT	WT
2313287	stomach	-0.62	WT	WT
sq1	lung	-0.609	WT	WT
ncih838	lung	-0.605	WT	WT
kelly	autonomic_ganglia	-0.586	WT	WT
fuov1	ovary	-0.579	WT	WT
bicr6	upper_aerodigestive_tract	-0.576	WT	WT
sjsa1	bone	-0.573	WT	WT
snu423	liver	-0.565	WT	WT
ht55	large_intestine	-0.556	WT	N581Y
a2780	ovary	-0.553	WT	V226M
g401	soft_tissue	-0.544	WT	WT
te14	oesophagus	-0.543	WT	WT
ncih1703	lung	-0.515	WT	WT
ln229	central_nervous_system	-0.511	WT	WT
cas1	central_nervous_system	-0.499	WT	WT
ncih1793	lung	-0.499	WT	WT
te6	oesophagus	-0.495	WT	WT
hsc3	upper_aerodigestive_tract	-0.479	WT	WT
ncih2126	lung	-0.47	WT	WT
mdamb468	breast	-0.469	WT	WT
hs729	soft_tissue	-0.463	WT	WT
rt112	urinary_tract	-0.455	WT	WT
cal54	kidney	-0.434	WT	WT
ks1	central_nervous_system	-0.431	WT	WT
mdamb453	breast	-0.415	WT	WT
cama1	breast	-0.407	WT	WT
scc25	upper_aerodigestive_tract	-0.406	WT	WT
kym1	soft_tissue	-0.405	WT	WT
ncih1975	lung	-0.384	WT	WT
snu685	endometrium	-0.374	WT	WT
snuc4	large_intestine	-0.374	WT	D22N
detroit562	upper_aerodigestive_tract	-0.37	WT	WT
daoy	central_nervous_system	-0.351	WT	WT
sw1353	bone	-0.344	WT	WT
a253	salivary_gland	-0.336	WT	WT
snu761	liver	-0.334	WT	WT
tc71	bone	-0.328	WT	WT
cal120	breast	-0.326	WT	WT
kms34	haematopoietic_and_lymphoid_tissue	-0.325	WT	WT
rh41	soft_tissue	-0.323	WT	WT
ncih661	lung	-0.307	WT	WT
caki1	kidney	-0.272	WT	WT
ncih2170	lung	-0.262	WT	WT
kyse180	oesophagus	-0.258	WT	I326V
gamg	central_nervous_system	-0.247	WT	WT
jhh7	liver	-0.242	WT	WT
ncih1435	lung	-0.242	WT	WT
snu1105	central_nervous_system	-0.237	WT	WT
bxpc3	pancreas	-0.234	WT	WT
f36p	haematopoietic_and_lymphoid_tissue	-0.232	WT	WT
hs852t	skin	-0.228	WT	WT
jl1	pleura	-0.226	WT	WT
cal27	upper_aerodigestive_tract	-0.217	WT	WT
mfe280	endometrium	-0.217	WT	WT
bftc909	kidney	-0.212	WT	WT
sw48	large_intestine	-0.211	WT	WT
kyse30	oesophagus	-0.206	WT	WT
li7	liver	-0.186	WT	WT
me180	cervix	-0.184	WT	WT
ncih2052	pleura	-0.179	WT	WT
8505c	thyroid	-0.177	WT	V600E
hcc95	lung	-0.163	WT	WT
sjrh30	soft_tissue	-0.163	WT	WT
accmeso1	pleura	-0.162	WT	WT
hlf	liver	-0.161	WT	WT
hcc4006	lung	-0.156	WT	WT
skndz	autonomic_ganglia	-0.156	WT	WT
ishikawaheraklio02er	endometrium	-0.137	WT	WT
rh30	soft_tissue	-0.129	WT	WT
pecapj34clonec12	upper_aerodigestive_tract	-0.127	WT	WT
dms273	lung	-0.122	WT	WT
snu349	kidney	-0.122	WT	WT
du145	prostate	-0.12	WT	WT
chagok1	lung	-0.119	WT	WT
kpnyn	autonomic_ganglia	-0.113	WT	WT
skes1	bone	-0.108	WT	WT
cal33	upper_aerodigestive_tract	-0.103	WT	WT
gb1	central_nervous_system	-0.101	WT	WT
abc1	lung	-0.098	WT	WT
an3ca	endometrium	-0.087	WT	WT
osrc2	kidney	-0.083	WT	WT
kyse510	oesophagus	-0.07	WT	WT
hs944t	skin	-0.061	WT	WT
kmrc20	kidney	-0.051	WT	WT
cov362	ovary	-0.05	WT	WT
ncih1048	lung	-0.043	WT	WT
snu449	liver	-0.041	WT	WT
caki2	kidney	-0.037	WT	WT
te10	oesophagus	-0.023	WT	WT
ncih2066	lung	-0.022	WT	WT
sknsh	autonomic_ganglia	-0.022	WT	WT
mkn1	stomach	-0.021	WT	WT
sbc5	lung	-0.013	WT	WT
tccsup	urinary_tract	-0.013	WT	WT
ncih1693	lung	-0.001	WT	WT
bt549	breast	0.007	WT	WT
8305c	thyroid	0.008	WT	V600E
a172	central_nervous_system	0.011	WT	WT
g402	soft_tissue	0.018	WT	WT
nb1	autonomic_ganglia	0.022	WT	I326V
hcc38	breast	0.027	WT	WT
vmrcrcw	kidney	0.039	WT	WT
hgc27	stomach	0.041	WT	WT
u251mg	central_nervous_system	0.041	WT	WT
lclc103h	lung	0.042	WT	WT
efm192a	breast	0.043	WT	WT
oe21	oesophagus	0.052	WT	WT
rmugs	ovary	0.056	WT	WT
ncih522	lung	0.076	WT	WT
achn	kidney	0.081	WT	WT
kpl1	breast	0.088	WT	WT
ht1080	soft_tissue	0.096	WT	WT
dms114	lung	0.1	WT	WT
sw1088	central_nervous_system	0.1	WT	WT
te9	oesophagus	0.103	WT	WT
sw1783	central_nervous_system	0.112	WT	WT
wm115	skin	0.112	WT	V600E
mewo	skin	0.113	WT	WT
u87mg	central_nervous_system	0.115	WT	WT
sudhl6	haematopoietic_and_lymphoid_tissue	0.123	WT	WT
te11	oesophagus	0.123	WT	WT
skmel2	skin	0.125	WT	WT
colo679	skin	0.128	WT	V600E
hcc15	lung	0.128	WT	WT
kyse70	oesophagus	0.129	WT	WT
kns81	central_nervous_system	0.13	WT	WT
kns62	lung	0.131	WT	WT
ncih446	lung	0.132	WT	WT
hcc1833	lung	0.133	WT	WT
rd	soft_tissue	0.142	WT	WT
bcpap	thyroid	0.144	WT	V600E
kyse450	oesophagus	0.144	WT	WT
769p	kidney	0.148	WT	WT
a2058	skin	0.158	WT	V600E
km12	large_intestine	0.159	WT	A712T
sf268	central_nervous_system	0.159	WT	WT
skmel30	skin	0.163	WT	D287H
ncih1437	lung	0.169	WT	WT
bht101	thyroid	0.173	WT	V600E
sf295	central_nervous_system	0.179	WT	WT
921	eye	0.184	WT	WT
snu738	central_nervous_system	0.186	WT	D22N
mfe319	endometrium	0.191	WT	WT
k029ax	skin	0.208	WT	V600E
rmgi	ovary	0.209	WT	WT
cal29	urinary_tract	0.212	WT	WT
wsudlcl2	haematopoietic_and_lymphoid_tissue	0.212	WT	WT
jhuem2	endometrium	0.218	WT	WT
kms27	haematopoietic_and_lymphoid_tissue	0.219	WT	WT
hepg2	liver	0.231	WT	WT
skhep1	liver	0.245	WT	V600E
lmsu	stomach	0.248	WT	WT
t24	urinary_tract	0.259	WT	WT
huh7	liver	0.26	WT	WT
colo829	skin	0.264	WT	V600E
colo320	large_intestine	0.267	WT	WT
fadu	upper_aerodigestive_tract	0.273	WT	WT
skmel5	skin	0.283	WT	V600E
hug1n	stomach	0.286	WT	WT
mcf7	breast	0.287	WT	WT
lk2	lung	0.304	WT	WT
ht1197	urinary_tract	0.307	WT	WT
ncih2172	lung	0.31	WT	WT
ncih1299	lung	0.328	WT	WT
skmel3	skin	0.329	WT	V600E
rpmi7951	skin	0.334	WT	V600E
kns42	central_nervous_system	0.335	WT	WT
thp1	haematopoietic_and_lymphoid_tissue	0.337	WT	WT
ncih1838	lung	0.351	WT	WT
ov90	ovary	0.352	WT	NVTAPT486T
a673	bone	0.353	WT	V600E
hcc1500	breast	0.354	WT	WT
mdst8	large_intestine	0.36	WT	V600E
ln18	central_nervous_system	0.366	WT	WT
t47d	breast	0.371	WT	WT
a498	kidney	0.372	WT	WT
rko	large_intestine	0.373	WT	V600E
cl34	large_intestine	0.381	WT	V600E
u118mg	central_nervous_system	0.381	WT	WT
ncih2228	lung	0.39	WT	WT
te1	oesophagus	0.39	WT	I326V
pfeiffer	haematopoietic_and_lymphoid_tissue	0.392	WT	WT
reh	haematopoietic_and_lymphoid_tissue	0.392	WT	WT
kyse150	oesophagus	0.393	WT	WT
tyknu	ovary	0.394	WT	WT
wm1799	skin	0.412	WT	V600E
ls411n	large_intestine	0.415	WT	V600E
697	haematopoietic_and_lymphoid_tissue	0.417	WT	WT
ncih28	pleura	0.422	WT	WT
sw1417	large_intestine	0.423	WT	V600E
igr39	skin	0.437	WT	WT
ocum1	stomach	0.438	WT	WT
igr1	skin	0.454	WT	V600E
meljuso	skin	0.458	WT	WT
hec265	endometrium	0.46	WT	WT
tuhr4tkb	kidney	0.46	WT	WT
snu719	stomach	0.464	WT	WT
igr37	skin	0.472	WT	V600E
mdamb436	breast	0.474	WT	WT
wm793	skin	0.474	WT	V600E
wm2664	skin	0.481	WT	WT
sw1271	lung	0.487	WT	S683N
ht29	large_intestine	0.501	WT	V600E
melho	skin	0.505	WT	V600E
colo205	large_intestine	0.507	WT	V600E
a101d	skin	0.514	WT	V600E
rvh421	skin	0.515	WT	V600E
sknmc	bone	0.516	WT	WT
jimt1	breast	0.521	WT	WT
skmel28	skin	0.523	WT	V600E
cov318	ovary	0.532	WT	WT
hs695t	skin	0.532	WT	V600E
hs939t	skin	0.533	WT	V600E
omm1	eye	0.533	WT	WT
ludlu1	lung	0.534	WT	WT
sudhl4	haematopoietic_and_lymphoid_tissue	0.543	WT	WT
a204	soft_tissue	0.553	WT	WT
sh4	skin	0.562	WT	V600E
786o	kidney	0.566	WT	WT
ipc298	skin	0.566	WT	WT
mdamb157	breast	0.573	WT	WT
hs294t	skin	0.586	WT	V600E
lncapclonefgc	prostate	0.592	WT	WT
uacc62	skin	0.598	WT	V600E
ku1919	urinary_tract	0.602	WT	WT
a375	skin	0.606	WT	V600E
c32	skin	0.618	WT	V600E
hcc1806	breast	0.626	WT	WT
loximvi	skin	0.626	WT	V600E
uacc257	skin	0.637	WT	V600E
mel285	eye	0.644	WT	WT
mdamb415	breast	0.66	WT	P74A
huh1	liver	0.712	WT	WT
ncih196	lung	0.717	WT	WT
sknas	autonomic_ganglia	0.755	WT	WT
oums23	large_intestine	0.781	WT	WT
hle	liver	0.805	WT	WT
colo741	skin	0.871	WT	V600E
colo201	large_intestine	0.972	WT	V600E
rl	haematopoietic_and_lymphoid_tissue	1.171	WT	WT
778	cervix		WT	WT
5637	urinary_tract		WT	WT
22rv1	prostate		WT	L597R
42mgba	central_nervous_system		WT	WT
59m	ovary		WT	WT
639v	urinary_tract		WT	WT
647v	urinary_tract		WT	WT
8mgba	central_nervous_system		WT	WT
a3kaw	haematopoietic_and_lymphoid_tissue		WT	WT
a4fuk	haematopoietic_and_lymphoid_tissue		WT	WT
a704	kidney		WT	WT
allsil	haematopoietic_and_lymphoid_tissue		WT	WT
am38	central_nervous_system		WT	V600E
aml193	haematopoietic_and_lymphoid_tissue		WT	WT
au565	breast		WT	WT
bcp1	haematopoietic_and_lymphoid_tissue		WT	WT
bdcm	haematopoietic_and_lymphoid_tissue		WT	WT
ben	lung		WT	WT
bftc905	urinary_tract		WT	WT
bhy	upper_aerodigestive_tract		WT	WT
bicr16	upper_aerodigestive_tract		WT	WT
bicr18	upper_aerodigestive_tract		WT	WT
bicr22	upper_aerodigestive_tract		WT	WT
bicr31	upper_aerodigestive_tract		WT	WT
bicr56	upper_aerodigestive_tract		WT	WT
bl41	haematopoietic_and_lymphoid_tissue		WT	WT
bl70	haematopoietic_and_lymphoid_tissue		WT	WT
bt20	breast		WT	WT
bt474	breast		WT	WT
bt483	breast		WT	WT
bv173	haematopoietic_and_lymphoid_tissue		WT	WT
c2bbe1	large_intestine		WT	WT
ca46	haematopoietic_and_lymphoid_tissue		WT	WT
cadoes1	bone		WT	WT
cal12t	lung		WT	G466V
cal148	breast		WT	WT
cal78	bone		WT	WT
calu3	lung		WT	WT
caov4	ovary		WT	WT
ccfsttg1	central_nervous_system		WT	R146Q
ccrfhsb2	haematopoietic_and_lymphoid_tissue		WT	WT
chp126	autonomic_ganglia		WT	WT
chp212	autonomic_ganglia		WT	WT
ci1	haematopoietic_and_lymphoid_tissue		WT	L485W
cjm	skin		WT	WT
cl14	large_intestine		WT	WT
cmlt1	haematopoietic_and_lymphoid_tissue		WT	WT
colo680n	oesophagus		WT	WT
colo684	endometrium		WT	WT
colo783	skin		WT	V600E
colo792	skin		WT	WT
colo800	skin		WT	V600E
corl24	lung		WT	WT
corl279	lung		WT	WT
corl311	lung		WT	WT
corl47	lung		WT	WT
corl88	lung		WT	WT
corl95	lung		WT	WT
cov434	ovary		WT	WT
cov644	ovary		WT	WT
d283med	central_nervous_system		WT	WT
d341med	central_nervous_system		WT	WT
daudi	haematopoietic_and_lymphoid_tissue		WT	WT
db	haematopoietic_and_lymphoid_tissue		WT	WT
dbtrg05mg	central_nervous_system		WT	V600E
del	haematopoietic_and_lymphoid_tissue		WT	WT
dms153	lung		WT	WT
dms454	lung		WT	WT
dms53	lung		WT	WT
dms79	lung		WT	WT
dnd41	haematopoietic_and_lymphoid_tissue		WT	WT
dohh2	haematopoietic_and_lymphoid_tissue		WT	WT
du4475	breast		WT	V600E
eb1	haematopoietic_and_lymphoid_tissue		WT	WT
ecc10	stomach		WT	WT
ecc12	stomach		WT	WT
ecgi10	oesophagus		WT	WT
efe184	endometrium		WT	WT
efm19	breast		WT	WT
efo21	ovary		WT	WT
efo27	ovary		WT	WT
eheb	haematopoietic_and_lymphoid_tissue		WT	WT
ejm	haematopoietic_and_lymphoid_tissue		WT	WT
em2	haematopoietic_and_lymphoid_tissue		WT	WT
en	endometrium		WT	I326V
eol1	haematopoietic_and_lymphoid_tissue		WT	WT
eplc272h	lung		WT	WT
es2	ovary		WT	V600E
ess1	endometrium		WT	WT
ftc133	thyroid		WT	WT
ftc238	thyroid		WT	WT
fu97	stomach		WT	WT
g292clonea141b1	bone		WT	WT
g361	skin		WT	V600E
ga10	haematopoietic_and_lymphoid_tissue		WT	WT
gciy	stomach		WT	WT
gct	soft_tissue		WT	V600E
gdm1	haematopoietic_and_lymphoid_tissue		WT	WT
gms10	central_nervous_system		WT	WT
gos3	central_nervous_system		WT	WT
granta519	haematopoietic_and_lymphoid_tissue		WT	WT
gss	stomach		WT	WT
h4	central_nervous_system		WT	WT
hara	lung		WT	WT
hcc1143	breast		WT	WT
hcc1187	breast		WT	WT
hcc1195	lung		WT	WT
hcc1395	breast		WT	WT
hcc1419	breast		WT	WT
hcc1428	breast		WT	WT
hcc1569	breast		WT	WT
hcc1599	breast		WT	WT
hcc1937	breast		WT	WT
hcc202	breast		WT	WT
hcc2157	breast		WT	WT
hcc2218	breast		WT	WT
hcc2279	lung		WT	WT
hcc2935	lung		WT	WT
hcc33	lung		WT	WT
hcc366	lung		WT	WT
hcc70	breast		WT	WT
hcc78	lung		WT	WT
hdlm2	haematopoietic_and_lymphoid_tissue		WT	WT
hdmyz	haematopoietic_and_lymphoid_tissue		WT	WT
hdqp1	breast		WT	WT
hec108	endometrium		WT	WT
hec151	endometrium		WT	WT
hec251	endometrium		WT	WT
hec59	endometrium		WT	WT
hh	haematopoietic_and_lymphoid_tissue		WT	WT
hl60	haematopoietic_and_lymphoid_tissue		WT	WT
hmcb	skin		WT	WT
hos	bone		WT	WT
hpball	haematopoietic_and_lymphoid_tissue		WT	WT
hs611t	haematopoietic_and_lymphoid_tissue		WT	WT
hs683	central_nervous_system		WT	WT
hs746t	stomach		WT	WT
hs936t	skin		WT	N581K
hsc2	upper_aerodigestive_tract		WT	WT
hsc4	upper_aerodigestive_tract		WT	WT
ht	haematopoietic_and_lymphoid_tissue		WT	WT
ht144	skin		WT	V600E
huh28	biliary_tract		WT	WT
huns1	haematopoietic_and_lymphoid_tissue		WT	WT
hut102	haematopoietic_and_lymphoid_tissue		WT	WT
hut78	haematopoietic_and_lymphoid_tissue		WT	WT
hutu80	small_intestine		WT	WT
imr32	autonomic_ganglia		WT	WT
istmes1	pleura		WT	WT
istmes2	pleura		WT	WT
j82	urinary_tract		WT	WT
jeko1	haematopoietic_and_lymphoid_tissue		WT	D22N
jhh1	liver		WT	WT
jhh2	liver		WT	WT
jhh4	liver		WT	WT
jhh5	liver		WT	WT
jhoc5	ovary		WT	WT
jhom1	ovary		WT	WT
jhom2b	ovary		WT	V600E
jhos2	ovary		WT	WT
jhos4	ovary		WT	WT
jhuem1	endometrium		WT	WT
jhuem7	endometrium		WT	K499T
jk1	haematopoietic_and_lymphoid_tissue		WT	WT
jm1	haematopoietic_and_lymphoid_tissue		WT	WT
ju77	pleura		WT	WT
jurkat	haematopoietic_and_lymphoid_tissue		WT	A728V
jurlmk1	haematopoietic_and_lymphoid_tissue		WT	WT
jvm2	haematopoietic_and_lymphoid_tissue		WT	WT
jvm3	haematopoietic_and_lymphoid_tissue		WT	K601N
k562	haematopoietic_and_lymphoid_tissue		WT	WT
kals1	central_nervous_system		WT	WT
karpas1106p	haematopoietic_and_lymphoid_tissue		WT	WT
karpas299	haematopoietic_and_lymphoid_tissue		WT	WT
karpas422	haematopoietic_and_lymphoid_tissue		WT	WT
kasumi6	haematopoietic_and_lymphoid_tissue		WT	WT
katoiii	stomach		WT	WT
kcl22	haematopoietic_and_lymphoid_tissue		WT	D22N
ke37	haematopoietic_and_lymphoid_tissue		WT	WT
ke39	stomach		WT	WT
ke97	haematopoietic_and_lymphoid_tissue		WT	WT
kg1	haematopoietic_and_lymphoid_tissue		WT	WT
kg1c	central_nervous_system		WT	V600E
kijk	haematopoietic_and_lymphoid_tissue		WT	WT
kle	endometrium		WT	WT
kmbc2	urinary_tract		WT	M650I
kmh2	haematopoietic_and_lymphoid_tissue		WT	WT
kmm1	haematopoietic_and_lymphoid_tissue		WT	WT
kmrc1	kidney		WT	WT
kmrc2	kidney		WT	WT
kmrc3	kidney		WT	WT
kms11	haematopoietic_and_lymphoid_tissue		WT	WT
kms12bm	haematopoietic_and_lymphoid_tissue		WT	WT
kms21bm	haematopoietic_and_lymphoid_tissue		WT	WT
kms26	haematopoietic_and_lymphoid_tissue		WT	D22N
kns60	central_nervous_system		WT	WT
ko52	haematopoietic_and_lymphoid_tissue		WT	WT
kpnrtbm1	autonomic_ganglia		WT	WT
ku812	haematopoietic_and_lymphoid_tissue		WT	WT
kuramochi	ovary		WT	WT
kyo1	haematopoietic_and_lymphoid_tissue		WT	WT
kyse140	oesophagus		WT	WT
kyse270	oesophagus		WT	WT
kyse520	oesophagus		WT	WT
l1236	haematopoietic_and_lymphoid_tissue		WT	WT
l363	haematopoietic_and_lymphoid_tissue		WT	WT
l428	haematopoietic_and_lymphoid_tissue		WT	WT
l540	haematopoietic_and_lymphoid_tissue		WT	WT
lama84	haematopoietic_and_lymphoid_tissue		WT	WT
lc1f	lung		WT	WT
lim2405	large_intestine		WT	V600E
lim2551	large_intestine		WT	V600E
lo68	pleura		WT	WT
loucy	haematopoietic_and_lymphoid_tissue		WT	WT
lounh91	lung		WT	WT
lp1	haematopoietic_and_lymphoid_tissue		WT	WT
lp6	soft_tissue		WT	WT
lxf289	lung		WT	WT
m059k	central_nervous_system		WT	WT
m07e	haematopoietic_and_lymphoid_tissue		WT	WT
malme3m	skin		WT	V600E
mc116	haematopoietic_and_lymphoid_tissue		WT	WT
mcc142	skin		WT	WT
mcc26	skin		WT	WT
mdamb134vi	breast		WT	WT
mdamb175vii	breast		WT	WT
mdamb361	breast		WT	V600E
mdamb435s	skin		WT	V600E
mdapca2b	prostate		WT	WT
me1	haematopoietic_and_lymphoid_tissue		WT	WT
mec1	haematopoietic_and_lymphoid_tissue		WT	WT
meg01	haematopoietic_and_lymphoid_tissue		WT	WT
mel202	eye		WT	WT
mel270	eye		WT	WT
messa	soft_tissue		WT	WT
mfm223	breast		WT	WT
mg63	bone		WT	WT
mhhcall2	haematopoietic_and_lymphoid_tissue		WT	WT
mhhcall3	haematopoietic_and_lymphoid_tissue		WT	WT
mhhes1	bone		WT	WT
mhhnb11	autonomic_ganglia		WT	WT
mino	haematopoietic_and_lymphoid_tissue		WT	WT
mj	haematopoietic_and_lymphoid_tissue		WT	WT
mkn74	stomach		WT	WT
ml1t	thyroid		WT	WT
mm127	skin		WT	G464E
mm138	skin		WT	V600E
mm170	skin		WT	V600E
mm253	skin		WT	V600E
mm28	eye		WT	WT
mm370	skin		WT	V600E
mm383	skin		WT	V600E
mm386	skin		WT	V600E
mm415	skin		WT	WT
mm426	skin		WT	V600E
mm466	skin		WT	V600E
mm473	skin		WT	V600E
mm485	skin		WT	WT
mm537	skin		WT	V600E
mm576	skin		WT	V600E
mm603	skin		WT	V600E
mm66	eye		WT	WT
molm6	haematopoietic_and_lymphoid_tissue		WT	WT
molp2	haematopoietic_and_lymphoid_tissue		WT	WT
molt13	haematopoietic_and_lymphoid_tissue		WT	WT
molt16	haematopoietic_and_lymphoid_tissue		WT	WT
molt3	haematopoietic_and_lymphoid_tissue		WT	WT
mp41	eye		WT	WT
msto211h	pleura		WT	WT
mutz5	haematopoietic_and_lymphoid_tissue		WT	WT
mv411	haematopoietic_and_lymphoid_tissue		WT	WT
nalm1	haematopoietic_and_lymphoid_tissue		WT	WT
nalm19	haematopoietic_and_lymphoid_tissue		WT	WT
nalm6	haematopoietic_and_lymphoid_tissue		WT	WT
namalwa	haematopoietic_and_lymphoid_tissue		WT	WT
nccstck140	stomach		WT	WT
ncih1092	lung		WT	WT
ncih1105	lung		WT	WT
ncih1184	lung		WT	WT
ncih1341	lung		WT	WT
ncih1395	lung		WT	G469A
ncih1436	lung		WT	WT
ncih146	lung		WT	WT
ncih1563	lung		WT	WT
ncih1618	lung		WT	WT
ncih1623	lung		WT	WT
ncih1648	lung		WT	WT
ncih1650	lung		WT	WT
ncih1651	lung		WT	WT
ncih1666	lung		WT	G466V
ncih1694	lung		WT	WT
ncih1755	lung		WT	G469A
ncih1781	lung		WT	WT
ncih1836	lung		WT	WT
ncih1869	lung		WT	WT
ncih1876	lung		WT	WT
ncih1915	lung		WT	WT
ncih1930	lung		WT	WT
ncih1963	lung		WT	WT
ncih2023	lung		WT	WT
ncih2029	lung		WT	WT
ncih2073	lung		WT	WT
ncih2081	lung		WT	WT
ncih2085	lung		WT	WT
ncih2087	lung		WT	L597V
ncih209	lung		WT	WT
ncih2106	lung		WT	WT
ncih211	lung		WT	WT
ncih2171	lung		WT	WT
ncih2196	lung		WT	WT
ncih2227	lung		WT	A320S
ncih226	lung		WT	WT
ncih2342	lung		WT	WT
ncih2405	lung		WT	WT
ncih2452	pleura		WT	WT
ncih292	lung		WT	WT
ncih322	lung		WT	WT
ncih3255	lung		WT	WT
ncih510	lung		WT	WT
ncih520	lung		WT	WT
ncih524	lung		WT	WT
ncih526	lung		WT	WT
ncih596	lung		WT	WT
ncih660	prostate		WT	E45D
ncih69	lung		WT	WT
ncih810	lung		WT	WT
ncih82	lung		WT	WT
ncih841	lung		WT	WT
ncih854	lung		WT	V600E
ncih889	lung		WT	WT
ncih929	haematopoietic_and_lymphoid_tissue		WT	WT
nco2	haematopoietic_and_lymphoid_tissue		WT	WT
nh6	autonomic_ganglia		WT	WT
nihovcar3	ovary		WT	WT
nmcg1	central_nervous_system		WT	V600E
no36	pleura		WT	WT
nugc4	stomach		WT	WT
oaw28	ovary		WT	WT
oaw42	ovary		WT	WT
oc314	ovary		WT	A747V
ociaml2	haematopoietic_and_lymphoid_tissue		WT	WT
ociaml3	haematopoietic_and_lymphoid_tissue		WT	WT
ociaml5	haematopoietic_and_lymphoid_tissue		WT	WT
ocily19	haematopoietic_and_lymphoid_tissue		WT	WT
ocily3	haematopoietic_and_lymphoid_tissue		WT
ocim1	haematopoietic_and_lymphoid_tissue		WT	WT
oe19	oesophagus		WT	WT
oe33	oesophagus		WT	WT
oncodg1	ovary		WT	WT
ons76	central_nervous_system		WT	WT
opm2	haematopoietic_and_lymphoid_tissue		WT	WT
ovcar4	ovary		WT	WT
ovise	ovary		WT	WT
ovkate	ovary		WT	WT
ovmana	ovary		WT	WT
ovsaho	ovary		WT	WT
ovtoko	ovary		WT	WT
p12ichikawa	haematopoietic_and_lymphoid_tissue		WT	I326V
p31fuj	haematopoietic_and_lymphoid_tissue		WT	WT
p3hr1	haematopoietic_and_lymphoid_tissue		WT	WT
pc14	lung		WT	WT
pc3	prostate		WT	WT
pecapj15	upper_aerodigestive_tract		WT	WT
pecapj49	upper_aerodigestive_tract		WT	WT
peer	haematopoietic_and_lymphoid_tissue		WT	WT
pf382	haematopoietic_and_lymphoid_tissue		WT	WT
plcprf5	liver		WT	WT
raji	haematopoietic_and_lymphoid_tissue		WT	WT
rcc10rgb	kidney		WT	WT
rdes	bone		WT	WT
rec1	haematopoietic_and_lymphoid_tissue		WT	WT
rerfgc1b	stomach		WT	WT
rerflcai	lung		WT	WT
rerflckj	lung		WT	WT
rerflcsq1	lung		WT	WT
ri1	haematopoietic_and_lymphoid_tissue		WT	WT
rl952	endometrium		WT	WT
rpmi8402	haematopoietic_and_lymphoid_tissue		WT	WT
rs411	haematopoietic_and_lymphoid_tissue		WT	WT
rt4	urinary_tract		WT	WT
s117	soft_tissue		WT	WT
scaber	urinary_tract		WT	WT
scc15	upper_aerodigestive_tract		WT	WT
scc4	upper_aerodigestive_tract		WT	WT
scc9	upper_aerodigestive_tract		WT	WT
sclc21h	lung		WT	WT
set2	haematopoietic_and_lymphoid_tissue		WT	WT
sf126	central_nervous_system		WT	WT
sigm5	haematopoietic_and_lymphoid_tissue		WT	V600E
sima	autonomic_ganglia		WT	WT
skbr3	breast		WT	WT
sklms1	soft_tissue		WT	WT
skmel1	skin		WT	V600E
skmel24	skin		WT	V600E
skmel31	skin		WT	V600E
skmes1	lung		WT	WT
skmm2	haematopoietic_and_lymphoid_tissue		WT	WT
skov3	ovary		WT	WT
skut1	soft_tissue		WT	WT
snu1040	large_intestine		WT	WT
snu1076	upper_aerodigestive_tract		WT	WT
snu1077	endometrium		WT	WT
snu119	ovary		WT	WT
snu1196	biliary_tract		WT	WT
snu1214	upper_aerodigestive_tract		WT	WT
snu1272	kidney		WT	WT
snu16	stomach		WT	WT
snu182	liver		WT	WT
snu201	central_nervous_system		WT	WT
snu216	stomach		WT	WT
snu245	biliary_tract		WT	WT
snu283	large_intestine		WT	WT
snu308	biliary_tract		WT	WT
snu324	pancreas		WT	WT
snu387	liver		WT	WT
snu398	liver		WT	WT
snu46	upper_aerodigestive_tract		WT	WT
snu466	central_nervous_system		WT	WT
snu475	liver		WT	WT
snu478	biliary_tract		WT	WT
snu489	central_nervous_system		WT	WT
snu5	stomach		WT	WT
snu503	large_intestine		WT	D22N
snu520	stomach		WT	WT
snu620	stomach		WT	WT
snu626	central_nervous_system		WT	WT
snu840	ovary		WT	WT
snu878	liver		WT	WT
snu899	upper_aerodigestive_tract		WT	WT
snuc1	large_intestine		WT	WT
snuc5	large_intestine		WT	V600E
sr786	haematopoietic_and_lymphoid_tissue		WT	WT
st486	haematopoietic_and_lymphoid_tissue		WT	WT
sudhl1	haematopoietic_and_lymphoid_tissue		WT	WT
sudhl10	haematopoietic_and_lymphoid_tissue		WT	WT
sudhl5	haematopoietic_and_lymphoid_tissue		WT	WT
sudhl8	haematopoietic_and_lymphoid_tissue		WT	T599IP
sum102pt	breast		WT	WT
sum149pt	breast		WT	WT
sum159pt	breast		WT	WT
sum185pe	breast		WT	WT
sum190pt	breast		WT	WT
sum225cwn	breast		WT	WT
supb15	haematopoietic_and_lymphoid_tissue		WT	WT
supm2	haematopoietic_and_lymphoid_tissue		WT	WT
supt1	haematopoietic_and_lymphoid_tissue		WT	WT
supt11	haematopoietic_and_lymphoid_tissue		WT	WT
sw1710	urinary_tract		WT	WT
t98g	central_nervous_system		WT	WT
tall1	haematopoietic_and_lymphoid_tissue		WT	WT
tanoue	haematopoietic_and_lymphoid_tissue		WT	WT
te15	oesophagus		WT	WT
te4	oesophagus		WT	WT
te441t	soft_tissue		WT	WT
te5	oesophagus		WT	WT
te617t	soft_tissue		WT	WT
te8	oesophagus		WT	WT
tf1	haematopoietic_and_lymphoid_tissue		WT	WT
tm31	central_nervous_system		WT	WT
tov112d	ovary		WT	WT
tt	thyroid		WT	WT
tt	oesophagus		WT	WT
tt2609c02	thyroid		WT	WT
tuhr10tkb	kidney		WT	WT
tuhr14tkb	kidney		WT	WT
u266b1	haematopoietic_and_lymphoid_tissue		WT	WT
u937	haematopoietic_and_lymphoid_tissue		WT	WT
uacc812	breast		WT	WT
uacc893	breast		WT	WT
umuc1	urinary_tract		WT	WT
vcap	prostate		WT	WT
vmcub1	urinary_tract		WT	WT
vmrcrcz	kidney		WT	WT
wm88	skin		WT	V600E
wm983b	skin		WT	V600E
yd10b	upper_aerodigestive_tract		WT	WT
yd15	salivary_gland		WT	WT
yh13	central_nervous_system		WT	WT
ykg1	central_nervous_system		WT	WT
yuduty	skin		WT	WT
zr751	breast		WT	WT
zr7530	breast		WT	I326T
gistt1	gastrointestinal_tract_(site_indeterminate)	-1.127
az521	stomach	-1.095
sum52pe	breast	-1.014
hcc1359	lung	-0.95
snb19	central_nervous_system	-0.748
cmk115	haematopoietic_and_lymphoid_tissue	-0.037			NRASmut
syo1	soft_tissue	0.028
1321n1	central_nervous_system	0.036
ymb1	breast	0.25
hrt18	large_intestine	0.576
rcc4	kidney	0.612
