# Supplementary material for: Tumor Intrinsic Efficacy by SHP2 and RTK Inhibitors in KRAS-Mutant Cancers
Source: Oxford University Press journal article supplement (doi:10.1158/1535-7163.mct-19-0170), 2019-08-22
Supplement: 15357163mct190170-sup-217436_2_supp_5691168_pvrtk4.xlsx [file 15357163mct190170-sup-217436_2_supp_5691168_pvrtk4.xlsx]

## Sheet: Common Cell lines
Cell Line Name	Amax SHP099	IC50 SHP099	PTPN11 shRNA - ATARIS Quantile
mkn45_stomach	-77.387	9.67939	-2.088
molm13_haematopoietic_and_lymphoid_tissue	-98.0881	2.97123	-1.692
molm16_haematopoietic_and_lymphoid_tissue	-40.0235	30	-1.668
monomac6_haematopoietic_and_lymphoid_tissue	-58.5913	22.7791	-1.608
monomac1_haematopoietic_and_lymphoid_tissue	-57.78	4.67266	-1.429
rerflcms_lung	-38.3157	30	-1.195
cmk_haematopoietic_and_lymphoid_tissue	1.06471	30	-1.129
hcc1954_breast	-47.7699	30	-1.091
hel9217_haematopoietic_and_lymphoid_tissue	-3.73576	30	-1.074
ncih1568_lung	-55.2077	21.8347	-1.024
ncih2110_lung	-55.2388	12.9851	-0.969
snu886_liver	-34.6322	30	-0.94
nugc3_stomach	-25.0074	30	-0.937
bc3c_urinary_tract	-50.0433	29.9404	-0.936
hcc827_lung	-97.6505	0.207282	-0.92
ncih716_large_intestine	-20.0671	30	-0.891
hep3b217_liver	-31.5457	30	-0.877
ncin87_stomach	-40.7469	30	-0.847
mfe296_endometrium	-35.7249	30	-0.845
ebc1_lung	-90.7276	11.5292	-0.843
cal851_breast	-73.4478	6.62985	-0.823
ncih2286_lung	-36.1847	30	-0.82
sem_haematopoietic_and_lymphoid_tissue	-25.875	30	-0.757
igrov1_ovary	-71.5586	6.89141	-0.755
bt16_central_nervous_system	-73.4647	0.753495	-0.717
sknbe2_autonomic_ganglia	-72.1101	1.78172	-0.714
cal51_breast	-7.51707	30	-0.682
hel_haematopoietic_and_lymphoid_tissue	-8.73515	30	-0.673
gi1_central_nervous_system	-41.9052	30	-0.672
snu1079_biliary_tract	-58.0819	8.74079	-0.643
corl105_lung	-81.0788	9.3329	-0.633
sq1_lung	2.62303	30	-0.609
sw620_large_intestine	-44.8425	30	-0.608
ncih838_lung	-9.39158	30	-0.605
bicr6_upper_aerodigestive_tract	-53.1506	13.0666	-0.576
snu423_liver	-4.36772	30	-0.565
a2780_ovary	-76.0965	14.4285	-0.553
g401_soft_tissue	-58.5111	20.9908	-0.544
te14_oesophagus	-31.8236	30	-0.543
shp77_lung	-7.26713	30	-0.542
ncih1703_lung	-20.4632	30	-0.515
ln229_central_nervous_system	-49.1926	30	-0.511
cas1_central_nervous_system	-28.7503	30	-0.499
te6_oesophagus	-29.6692	30	-0.495
kyse410_oesophagus	-6.7591	30	-0.483
hsc3_upper_aerodigestive_tract	-69.4721	10.4403	-0.479
ncih2126_lung	-35.3437	30	-0.47
mdamb468_breast	-10.6551	30	-0.469
rt112_urinary_tract	-54.0162	25.6962	-0.455
cal54_kidney	-64.7596	10.4307	-0.434
ks1_central_nervous_system	-66.5274	9.73207	-0.431
mdamb453_breast	-42.9285	30	-0.415
cama1_breast	14.4971	30	-0.407
scc25_upper_aerodigestive_tract	-63.9028	17.3837	-0.406
ncih1975_lung	-43.6114	30	-0.384
snu685_endometrium	-1.76453	30	-0.374
snuc4_large_intestine	-51.528	13.5479	-0.374
detroit562_upper_aerodigestive_tract	-55.5828	16.7496	-0.37
hcc44_lung	1.76372	30	-0.355
daoy_central_nervous_system	0.398284	30	-0.351
sw1353_bone	-34.2392	30	-0.344
snu761_liver	-53.7051	25.5291	-0.334
cal120_breast	-26.2992	30	-0.326
rh41_soft_tissue	-27.6084	30	-0.323
ncih661_lung	9.42893	30	-0.307
cw2_large_intestine	-46.2778	30	-0.29
caki1_kidney	-61.9631	12.0276	-0.272
hupt4_pancreas	-53.0416	24.3281	-0.263
ncih2170_lung	-40.8607	30	-0.262
kyse180_oesophagus	-42.0103	30	-0.258
miapaca2_pancreas	-3.76016	30	-0.248
gamg_central_nervous_system	-3.34652	30	-0.247
jhh7_liver	5.52794	30	-0.242
corl23_lung	-5.98601	30	-0.238
bxpc3_pancreas	-18.0992	30	-0.234
hs852t_skin	-43.1097	30	-0.228
jl1_pleura	-26.1019	30	-0.226
mfe280_endometrium	-13.0398	30	-0.217
cal27_upper_aerodigestive_tract	-89.2243	3.45781	-0.217
bftc909_kidney	-10.0806	30	-0.212
sw48_large_intestine	-65.1181	10.5322	-0.211
kyse30_oesophagus	-1.6373	30	-0.206
li7_liver	-24.2083	30	-0.186
snu61_large_intestine	-30.3525	30	-0.183
ncih2052_pleura	-17.0143	30	-0.179
8505c_thyroid	-13.127	30	-0.177
panc1005_pancreas	-26.2481	30	-0.177
hcc95_lung	-54.6861	23.4918	-0.163
accmeso1_pleura	-3.59169	30	-0.162
hlf_liver	-5.99529	30	-0.161
hcc4006_lung	-100.092	1.29051	-0.156
suit2_pancreas	-3.1462	30	-0.135
pecapj34clonec12_upper_aerodigestive_tract	-77.9395	10.9053	-0.127
snu349_kidney	-8.51381	30	-0.122
dms273_lung	-9.159	30	-0.122
chagok1_lung	5.98973	30	-0.119
skes1_bone	-4.26165	30	-0.108
gb1_central_nervous_system	-33.4517	30	-0.101
abc1_lung	-1.3253	30	-0.098
an3ca_endometrium	-21.664	30	-0.087
sw403_large_intestine	-39.1873	30	-0.083
ls180_large_intestine	-10.0901	30	-0.076
hs944t_skin	1.14558	30	-0.061
ncih747_large_intestine	-48.9309	30	-0.06
kmrc20_kidney	-36.7005	30	-0.051
cov362_ovary	-44.1338	30	-0.05
ncih1048_lung	-38.1468	30	-0.043
snu449_liver	-6.01115	30	-0.041
caki2_kidney	-38.2336	30	-0.037
hupt3_pancreas	1.05762	30	-0.022
sknsh_autonomic_ganglia	-31.0017	30	-0.022
mkn1_stomach	-31.2132	30	-0.021
sbc5_lung	3.97488	30	-0.013
a549_lung	-11.9305	30	-0.005
calu6_lung	-0.820437	30	-0.002
bt549_breast	-32.1269	30	0.007
a172_central_nervous_system	-54.3626	23.3831	0.011
panc0203_pancreas	-16.073	30	0.013
ncih441_lung	-22.5575	30	0.013
g402_soft_tissue	-38.0728	30	0.018
nb1_autonomic_ganglia	-52.7684	26.4797	0.022
vmrcrcw_kidney	-19.776	30	0.039
cfpac1_pancreas	13.585	30	0.041
u251mg_central_nervous_system	-41.7562	30	0.041
lclc103h_lung	-10.0022	30	0.042
efm192a_breast	-7.40587	30	0.043
l33_pancreas	-53.236	22.2518	0.047
rmugs_ovary	-34.8742	30	0.056
achn_kidney	-59.0715	9.09703	0.081
ht1080_soft_tissue	0.875528	30	0.096
sw1088_central_nervous_system	7.16467	30	0.1
sw1783_central_nervous_system	-13.752	30	0.112
wm115_skin	-40.9725	30	0.112
mewo_skin	-19.7576	30	0.113
u87mg_central_nervous_system	-42.1551	30	0.115
te11_oesophagus	-78.6728	5.70293	0.123
dang_pancreas	6.88794	30	0.125
ncih1373_lung	-1.05523	30	0.125
skco1_large_intestine	-56.4046	23.9404	0.126
colo679_skin	7.64012	30	0.128
hcc15_lung	-0.797605	30	0.128
kyse70_oesophagus	-34.3579	30	0.129
kns62_lung	0.752873	30	0.131
rd_soft_tissue	-6.93767	30	0.142
kyse450_oesophagus	-57.0789	23.277	0.144
ncih1792_lung	3.58863	30	0.145
patu8902_pancreas	0.809148	30	0.146
769p_kidney	-57.0408	11.4105	0.148
a2058_skin	-1.05425	30	0.158
sf268_central_nervous_system	-4.21878	30	0.159
km12_large_intestine	-66.8795	16.234	0.159
skmel30_skin	-7.52568	30	0.163
ncih1437_lung	-8.82144	30	0.169
921_eye	1.15898	30	0.184
snu738_central_nervous_system	-24.1059	30	0.186
mfe319_endometrium	-54.7274	10.1666	0.191
k029ax_skin	2.46381	30	0.208
cal29_urinary_tract	-54.0306	13.9812	0.212
panc1_pancreas	-0.119023	30	0.215
jhuem2_endometrium	-7.05679	30	0.218
panc0403_pancreas	-15.0045	30	0.229
skhep1_liver	-2.25956	30	0.245
lmsu_stomach	-41.7043	30	0.248
ncih1573_lung	-4.01209	30	0.257
kp4_pancreas	-7.09346	30	0.266
colo320_large_intestine	-5.87178	30	0.267
skmel5_skin	4.68684	30	0.283
ls513_large_intestine	-31.1199	30	0.301
lk2_lung	-3.36619	30	0.304
snuc2a_large_intestine	-25.8227	30	0.307
ncih2172_lung	-17.9881	30	0.31
ncih1299_lung	-0.346527	30	0.328
skmel3_skin	-21.1763	30	0.329
hmc18_breast	-31.9111	30	0.329
rpmi7951_skin	-5.59317	30	0.334
kns42_central_nervous_system	-4.58721	30	0.335
thp1_haematopoietic_and_lymphoid_tissue	-2.33644	30	0.337
a673_bone	0.60827	30	0.353
hcc1500_breast	10.8101	30	0.354
tccpan2_pancreas	1.92512	30	0.355
mdst8_large_intestine	0.547175	30	0.36
ln18_central_nervous_system	-31.0099	30	0.366
t47d_breast	0.456404	30	0.371
a498_kidney	-41.5707	30	0.372
rko_large_intestine	5.6273	30	0.373
ncih2030_lung	-26.8591	30	0.373
ncih460_lung	-0.0730785	30	0.375
u118mg_central_nervous_system	2.74731	30	0.381
cl34_large_intestine	-11.2372	30	0.381
te1_oesophagus	-5.38794	30	0.39
ncih2228_lung	-7.96102	30	0.39
kyse150_oesophagus	1.90583	30	0.393
tyknu_ovary	4.3765	30	0.394
ncih23_lung	-6.38509	30	0.401
ncih1944_lung	-19.0605	30	0.405
wm1799_skin	-11.6672	30	0.412
697_haematopoietic_and_lymphoid_tissue	-13.5594	30	0.417
ncih28_pleura	-45.2491	30	0.422
sw1417_large_intestine	2.56855	30	0.423
igr39_skin	-0.704775	30	0.437
hct15_large_intestine	-6.66196	30	0.44
hct116_large_intestine	4.54034	30	0.443
sw1573_lung	-7.41568	30	0.456
meljuso_skin	7.86204	30	0.458
hec265_endometrium	1.37979	30	0.46
ncih1355_lung	-23.4815	30	0.47
igr37_skin	3.69242	30	0.472
mdamb436_breast	-36.1111	30	0.474
wm2664_skin	-3.65636	30	0.481
ht29_large_intestine	-11.4835	30	0.501
heya8_ovary	-6.55968	30	0.503
melho_skin	-2.73398	30	0.505
sngm_endometrium	-56.0048	22.3208	0.51
a101d_skin	3.83791	30	0.514
rvh421_skin	1.89119	30	0.515
jimt1_breast	-33.0387	30	0.521
skmel28_skin	-6.07188	30	0.523
hs695t_skin	-3.50777	30	0.532
ludlu1_lung	-44.4596	30	0.534
sudhl4_haematopoietic_and_lymphoid_tissue	-6.84775	30	0.543
pk1_pancreas	-2.37067	30	0.548
sw480_large_intestine	-4.93482	30	0.553
a204_soft_tissue	-54.5777	17.1707	0.553
sh4_skin	5.40731	30	0.562
patu8988t_pancreas	-4.52498	30	0.562
ipc298_skin	-1.32857	30	0.566
786o_kidney	-2.15143	30	0.566
mdamb157_breast	-22.3964	30	0.573
kp3_pancreas	-20.5293	30	0.577
su8686_pancreas	-21.1044	30	0.585
hs294t_skin	-1.63363	30	0.586
hec50b_endometrium	-5.88248	30	0.589
uacc62_skin	-6.01972	30	0.598
ku1919_urinary_tract	-17.4085	30	0.602
a375_skin	-3.12112	30	0.606
mdamb231_breast	4.9063	30	0.612
c32_skin	-14.7851	30	0.618
loximvi_skin	6.96535	30	0.626
hcc1806_breast	-52.7015	18.8564	0.626
uacc257_skin	-0.715125	30	0.637
mdamb415_breast	-22.5431	30	0.66
ncih2122_lung	-32.8549	30	0.706
ncih196_lung	-12.0257	30	0.717
oums23_large_intestine	-4.0864	30	0.781
snu81_large_intestine	-9.82341	30	0.839
colo741_skin	-13.9184	30	0.871
