# Supplementary material for: Tumor Intrinsic Efficacy by SHP2 and RTK Inhibitors in KRAS-Mutant Cancers
Source: Oxford University Press journal article supplement (doi:10.1158/1535-7163.mct-19-0170), 2019-08-22
Supplement: 15357163mct190170-sup-217436_2_supp_5691169_pvrtk4.xlsx [file 15357163mct190170-sup-217436_2_supp_5691169_pvrtk4.xlsx]

## Sheet: SHP099 2D 3D screen
	Cell Line Name	KRAS mutation	Lineage	SHP099 IC50: 3D	SHP099 IC50: 2D
	NCI-H1573	G12A	Lung	2.006	10
	KYSE-410	G12C	Esophageal	10	10
	MIA PaCa-2	G12C	Pancreas	1.724	10
	NCI-H358	G12C	Lung	1.233	10
	NCI-H2122	G12C	Lung	10	--
	NCI-H23	G12C	Lung	5.957	10
	KP-4	G12D	Pancreas	0.867	--
	SNU-601	G12D	Stomach	10	10
	COR-L23	G12V	Lung	10	10
	NCI-H441	G12V	Lung	2.964	10
	NCI-H727	G12V	Lung	3.806	10
	HCT116	G13D	Colon	10	--
	Calu-6	Q61K	Pancreas	10	10
	KYSE520	WT	Esophageal	*	3.866
				* slow growth
				-- data not available

## Sheet: RTKi 2D 3D screen
	Cell Line Name	KRAS mutation	Lineage	RTKi IC50: 3D	RTKi IC50: 2D
	NCI-H1573	G12A	Lung	0.09	2.112
	NCI-H2009	G12A	Lung	*	5.323
	Calu-1	G12C	Lung	*	10
	KYSE-410	G12C	Esophageal	0.105	0.89
	MIAPaCa-2	G12C	Pancreas	0.664	2.956
	NCI-H1792	G12C	Lung	*	2.588
	NCI-H2122	G12C	Lung	2.779	--
	NCI-H23	G12C	Lung	0.361	4.672
	NCI-H358	G12C	Lung	0.1	1.154
	KP-4	G12D	Lung	0.219	--
	SNU-601	G12D	Stomach	3.675	2.965
	COR-L23	G12V	Lung	4.281	4.905
	NCI-H441	G12V	Lung	0.042	3.953
	NCI-H727	G12V	Lung	0.504	2.215
	HCT116	G13D	Colon	6.389	--
	T3M4	Q61H	Pancreas	*	2.373
	Calu-6	Q61K	Lung	3.895	7.005
	KYSE-520	WT	Esophageal	*	0.609
				* slow growth
				-- data not available
